# Supplementary material for: Characteristics of built food environments associated with alternative protein food choices: a systematic review
Source: PubMed Central journal article supplement (PMC11100026; doi:10.1186/s12966-024-01606-6), 2024-05-16
Supplement: 12966_2024_1606_MOESM2_ESM.pdf [file 12966_2024_1606_MOESM2_ESM.pdf]

**Characteristics of built food environment associated with alternative protein food choices:**

**A systematic review**

**Additional file 2:**

**Supplementary Table 2a** The results of quality evaluation and risk of bias assessment performed with JBI tool for quantitative studies

**Supplementary Table 2b** The results of quality evaluation and risk of bias assessment performed with JBI tool for qualitative studies

**Supplementary Table 2a** The results of quality evaluation and risk of bias assessment performed with JBI tool for quantitative studies

| No. | Publication           | 1. Were the criteria for inclusion in the sample clearly defined? | 2. Were the study participants and the setting described in detail? | 3. Was the predictor measured in a valid and reliable way? | 4. Were objective, standard criteria used for measurement of the condition? | 5. Were confounding factors identified? | 6. Were strategies to deal with confounding factors stated? | 7. Were the outcomes measured in a valid and reliable way? | 8. Was appropriate statistical analysis used? | No. of 'YES' | No. of 'YES'*2 + No. of 'UN'*1 | Overall quality score | Overall risk of bias |
|-----|-----------------------|-------------------------------------------------------------------|---------------------------------------------------------------------|------------------------------------------------------------|-----------------------------------------------------------------------------|-----------------------------------------|-------------------------------------------------------------|------------------------------------------------------------|-----------------------------------------------|--------------|--------------------------------|-----------------------|----------------------|
|     |                       | Final Score                                                       | Final Score                                                         | Final Score                                                | Final Score                                                                 | Final Score                             | Final Score                                                 | Final Score                                                | Final Score                                   |              |                                |                       |                      |
| 1   | Aaslyng [2021]        | Yes                                                               | Yes                                                                 | Yes                                                        | Yes                                                                         | No                                      | No                                                          | Yes                                                        | Yes                                           | 6            | 12                             | 75                    | LOW                  |
| 2   | Aerni [2011]          | Yes                                                               | Yes                                                                 | Yes                                                        | Yes                                                                         | Yes                                     | Yes                                                         | Yes                                                        | Yes                                           | 8            | 16                             | 100                   | LOW                  |
| 3   | Ali [2022]            | Yes                                                               | Yes                                                                 | Yes                                                        | Yes                                                                         | No                                      | Yes                                                         | Yes                                                        | Yes                                           | 7            | 14                             | 88                    | LOW                  |
| 4   | Baker [2016]          | No                                                                | Yes                                                                 | Yes                                                        | Yes                                                                         | Yes                                     | Yes                                                         | Yes                                                        | Yes                                           | 7            | 14                             | 88                    | LOW                  |
| 5   | Borkowski [2020]      | Yes                                                               | Yes                                                                 | NA                                                         | NA                                                                          | Yes                                     | No                                                          | Yes                                                        | Yes                                           | 5            | 10                             | 83                    | LOW                  |
| 6   | Brooker [2022]        | Yes                                                               | Yes                                                                 | NA                                                         | NA                                                                          | Yes                                     | Yes                                                         | Yes                                                        | Yes                                           | 6            | 12                             | 100                   | LOW                  |
| 7   | Clark [2019]          | Yes                                                               | Yes                                                                 | Yes                                                        | Yes                                                                         | Yes                                     | Yes                                                         | Yes                                                        | Yes                                           | 8            | 16                             | 100                   | LOW                  |
| 8   | Collins [2019]        | Yes                                                               | Yes                                                                 | Yes                                                        | Yes                                                                         | Yes                                     | Yes                                                         | Yes                                                        | Yes                                           | 8            | 16                             | 100                   | LOW                  |
| 9   | Drake [2003]          | Yes                                                               | Yes                                                                 | Yes                                                        | Yes                                                                         | No                                      | No                                                          | Yes                                                        | Yes                                           | 6            | 12                             | 75                    | LOW                  |
| 10  | Florença [2021]       | Yes                                                               | Yes                                                                 | Yes                                                        | Yes                                                                         | Yes                                     | Yes                                                         | Yes                                                        | Yes                                           | 8            | 16                             | 100                   | LOW                  |
| 11  | García-Segovia [2020] | No                                                                | No                                                                  | Yes                                                        | Yes                                                                         | Yes                                     | Yes                                                         | Yes                                                        | Yes                                           | 6            | 12                             | 75                    | LOW                  |
| 12  | Herbert [2021]        | No                                                                | Yes                                                                 | Yes                                                        | Yes                                                                         | Yes                                     | No                                                          | Yes                                                        | Yes                                           | 6            | 12                             | 75                    | LOW                  |
| 13  | Hwang [2020]          | Yes                                                               | Yes                                                                 | Yes                                                        | Yes                                                                         | Yes                                     | Yes                                                         | Yes                                                        | Yes                                           | 8            | 16                             | 100                   | LOW                  |
| 14  | Jones [2020]          | Yes                                                               | Yes                                                                 | NA                                                         | NA                                                                          | NA                                      | NA                                                          | UN                                                         | No                                            | 2            | 5                              | 63                    | MODERATE             |
| 15  | Menozzi [2017]        | Yes                                                               | Yes                                                                 | Yes                                                        | Yes                                                                         | Yes                                     | Yes                                                         | Yes                                                        | Yes                                           | 8            | 16                             | 100                   | LOW                  |
| 16  | Michel [2021]         | Yes                                                               | Yes                                                                 | Yes                                                        | Yes                                                                         | Yes                                     | Yes                                                         | Yes                                                        | Yes                                           | 8            | 16                             | 100                   | LOW                  |
| 17  | Motoki [2022]         | Yes                                                               | Yes                                                                 | Yes                                                        | Yes                                                                         | Yes                                     | Yes                                                         | Yes                                                        | Yes                                           | 8            | 16                             | 100                   | LOW                  |
| 18  | Ortega [2022]         | Yes                                                               | Yes                                                                 | Yes                                                        | Yes                                                                         | Yes                                     | Yes                                                         | Yes                                                        | Yes                                           | 8            | 16                             | 100                   | LOW                  |
| 19  | Palmieri [2021]       | Yes                                                               | Yes                                                                 | Yes                                                        | Yes                                                                         | Yes                                     | Yes                                                         | Yes                                                        | Yes                                           | 8            | 16                             | 100                   | LOW                  |
| 20  | Pippinato [2020]      | Yes                                                               | No                                                                  | NA                                                         | NA                                                                          | No                                      | No                                                          | Yes                                                        | NA                                            | 2            | 4                              | 40                    | HIGH                 |
| 21  | Porretta [2018]       | No                                                                | No                                                                  | Yes                                                        | Yes                                                                         | No                                      | No                                                          | Yes                                                        | No                                            | 3            | 6                              | 38                    | HIGH                 |
| 22  | Schwarz [2020]        | Yes                                                               | Yes                                                                 | Yes                                                        | Yes                                                                         | No                                      | No                                                          | Yes                                                        | No                                            | 5            | 10                             | 63                    | MODERATE             |
| 23  | Vandenbroele [2021]   | Yes                                                               | Yes                                                                 | Yes                                                        | Yes                                                                         | Yes                                     | Yes                                                         | Yes                                                        | Yes                                           | 8            | 16                             | 100                   | LOW                  |
| 24  | Weinrich [2023]       | Yes                                                               | Yes                                                                 | Yes                                                        | Yes                                                                         | Yes                                     | Yes                                                         | Yes                                                        | Yes                                           | 8            | 16                             | 100                   | LOW                  |

**Note:**

UN - unclear

NA - not applicable

Yes - 2 points

Unclear - 1 point

No - 0 points

In case of NA - the maximum score was adjusted respectively

Maximum score (when all criteria were rated 'Yes') = 16 points

Final score - a score agreed between the two reviewers

**Supplementary Table 2b** The results of quality evaluation and risk of bias assessment performed with JBI tool for qualitative studies

| No. | Publication             | 1. Is there congruity between the stated philosophical perspective and the research methodology? | 2. Is there congruity between the research methodology and the research question or objectives? | 3. Is there congruity between the research methodology and the methods used to collect data? | 4. Is there congruity between the research methodology and the representation and analysis of data? | 5. Is there congruity between the research methodology and the interpretation of results? | 6. Is there a statement locating the researcher culturally or theoretically? | 7. Is the influence of the researcher on the research, and vice-versa, addressed? | 8. Are participants, and their voices, adequately represented? | 9. Is the research ethical according to current criteria or, for recent studies, and is there evidence of ethical approval by an appropriate body? | 10. Do the conclusions drawn in the research report flow from the analysis, or interpretation, of the data? | No. of 'YES' | No. of 'YES'*2 + No. of 'UN'*1 | Overall quality score | Overall risk of bias |
|-----|-------------------------|--------------------------------------------------------------------------------------------------|-------------------------------------------------------------------------------------------------|----------------------------------------------------------------------------------------------|-----------------------------------------------------------------------------------------------------|-------------------------------------------------------------------------------------------|------------------------------------------------------------------------------|-----------------------------------------------------------------------------------|----------------------------------------------------------------|----------------------------------------------------------------------------------------------------------------------------------------------------|-------------------------------------------------------------------------------------------------------------|--------------|--------------------------------|-----------------------|----------------------|
|     |                         | Final Score                                                                                      | Final Score                                                                                     | Final Score                                                                                  | Final Score                                                                                         | Final Score                                                                               | Final Score                                                                  | Final Score                                                                       | Final Score                                                    | Final Score                                                                                                                                        | Final Score                                                                                                 |              |                                |                       |                      |
| 1   | Bisconsin-Júnior [2022] | Yes                                                                                              | Yes                                                                                             | Yes                                                                                          | Yes                                                                                                 | Yes                                                                                       | No                                                                           | No                                                                                | Yes                                                            | Yes                                                                                                                                                | Yes                                                                                                         | 7            | 14                             | 70                    | LOW                  |
| 2   | Bogueva [2022]          | Yes                                                                                              | Yes                                                                                             | Yes                                                                                          | Yes                                                                                                 | Yes                                                                                       | No                                                                           | No                                                                                | Yes                                                            | Yes                                                                                                                                                | Yes                                                                                                         | 7            | 14                             | 70                    | LOW                  |
| 3   | Cai [2021]              | Yes                                                                                              | Yes                                                                                             | Yes                                                                                          | Yes                                                                                                 | Yes                                                                                       | No                                                                           | No                                                                                | Yes                                                            | Yes                                                                                                                                                | Yes                                                                                                         | 7            | 14                             | 70                    | LOW                  |
| 4   | Grasso [2020]           | Yes                                                                                              | Yes                                                                                             | Yes                                                                                          | Yes                                                                                                 | Yes                                                                                       | No                                                                           | No                                                                                | NA                                                             | NA                                                                                                                                                 | Yes                                                                                                         | 5            | 10                             | 38                    | HIGH                 |
| 5   | Gravely [2018]          | Yes                                                                                              | Yes                                                                                             | Yes                                                                                          | Yes                                                                                                 | Yes                                                                                       | No                                                                           | Yes                                                                               | Yes                                                            | No                                                                                                                                                 | Yes                                                                                                         | 7            | 14                             | 70                    | LOW                  |
| 6   | Pérez-Lloréns [2020]    | NA                                                                                               | NA                                                                                              | NA                                                                                           | NA                                                                                                  | NA                                                                                        | NA                                                                           | NA                                                                                | NA                                                             | No                                                                                                                                                 | Yes                                                                                                         | 1            | 2                              | 50                    | MODERATE             |
| 7   | Reverberi [2021]        | No                                                                                               | No                                                                                              | Yes                                                                                          | UN                                                                                                  | UN                                                                                        | No                                                                           | No                                                                                | Yes                                                            | No                                                                                                                                                 | UN                                                                                                          | 2            | 7                              | 35                    | HIGH                 |

**Note:**

UN - unclear

NA - not applicable

Yes - 2 points

Unclear - 1 point

No - 0 points

In case of NA - the maximum score was adjusted respectively

Maximum score (when all criteria were rated 'Yes') = 20 points

Final score - a score agreed between the two reviewers
